# Supplementary material
Source: bioRxiv or medRxiv preprint supplement (https://www.biorxiv.org/highwire/filestream/109453/field_highwire_adjunct_files/0/296830-1.pdf)

Figure S1

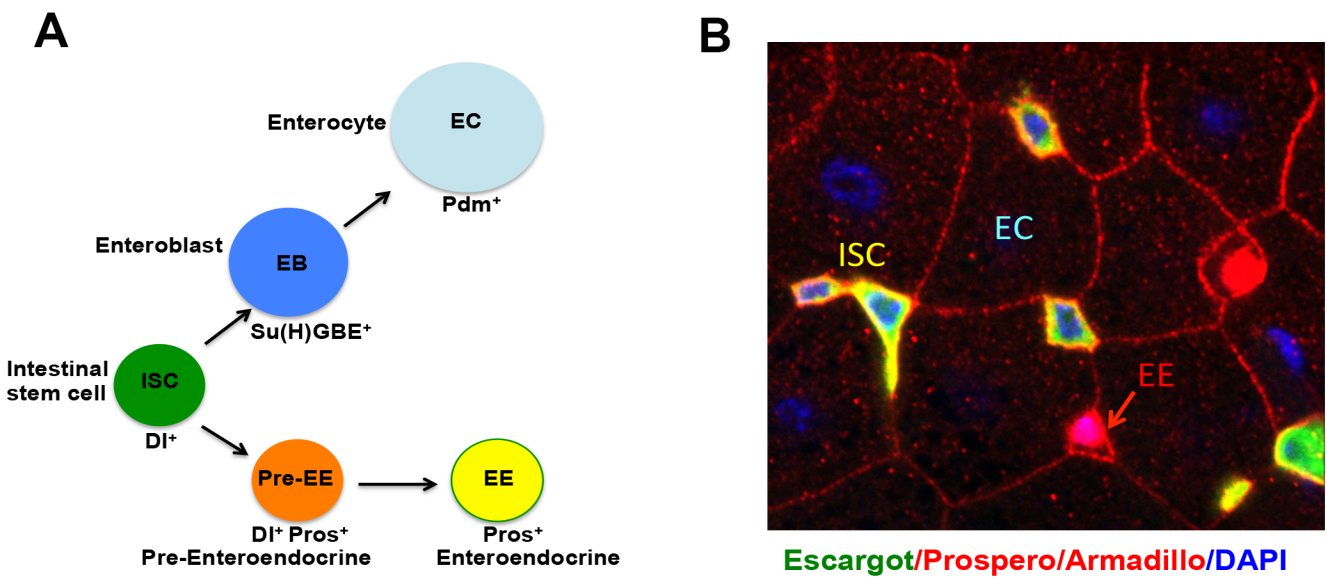

Figure S2

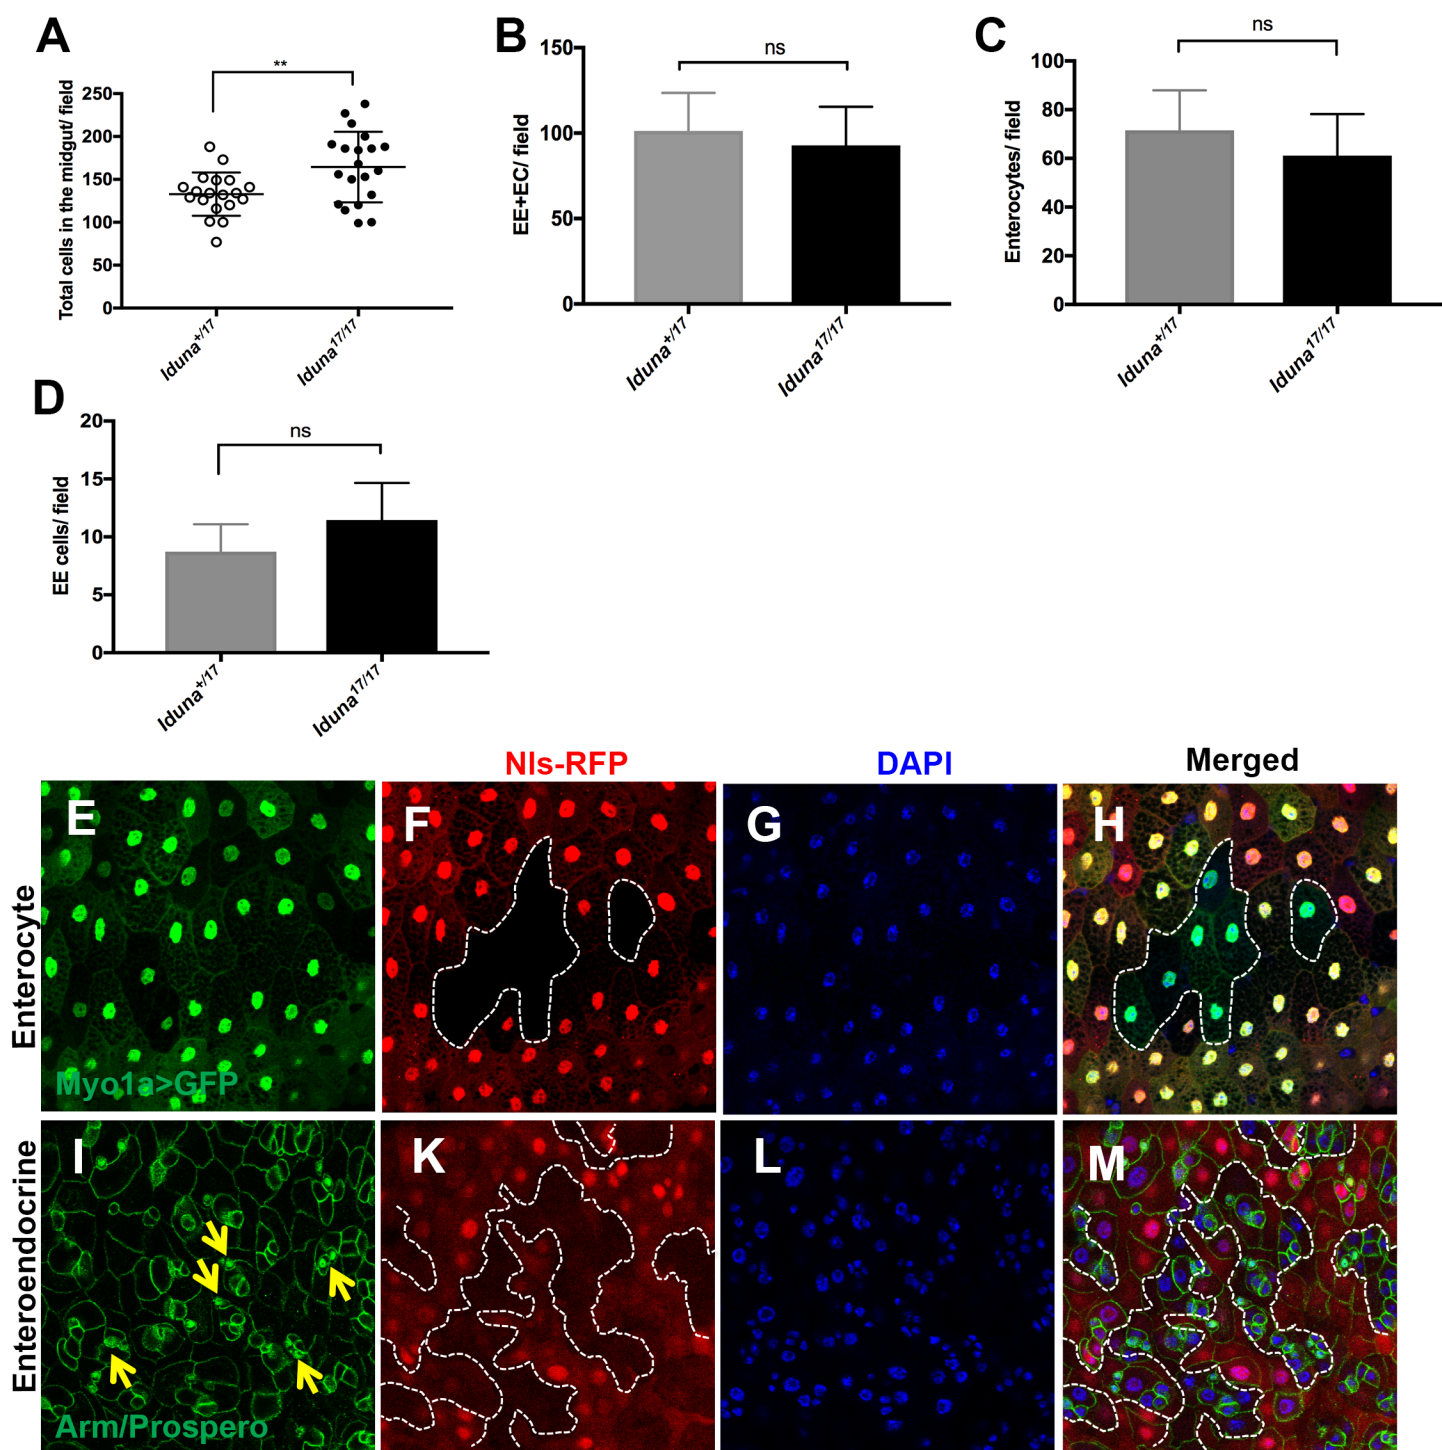

Supplement: Supplementary file [file 296830-1.pdf]
